# Supplementary material
Source: Springer Nature journal article supplement (https://www.springermedizin.de/resource/supplementary/12943_2012_1103_MOESM5_ESM.pdf/9552488)

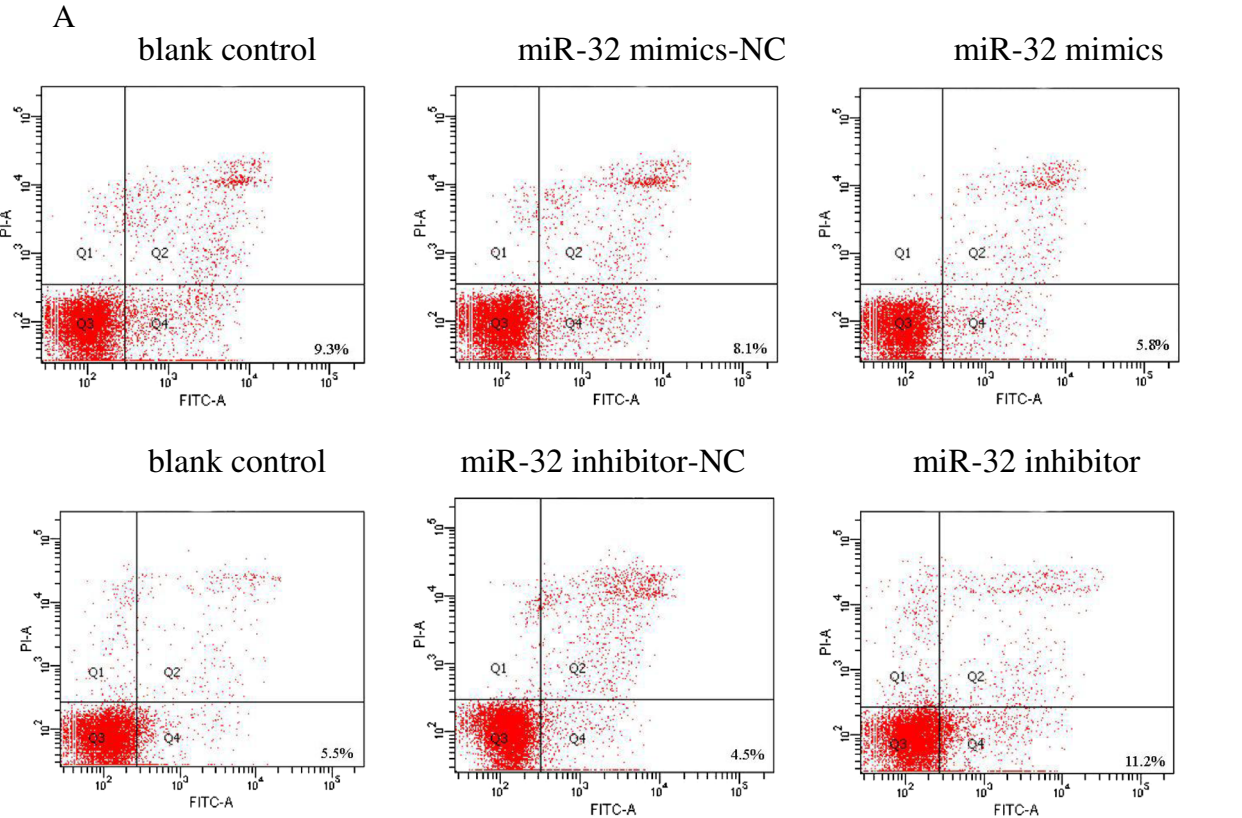

**B**

SW480

HCT-116

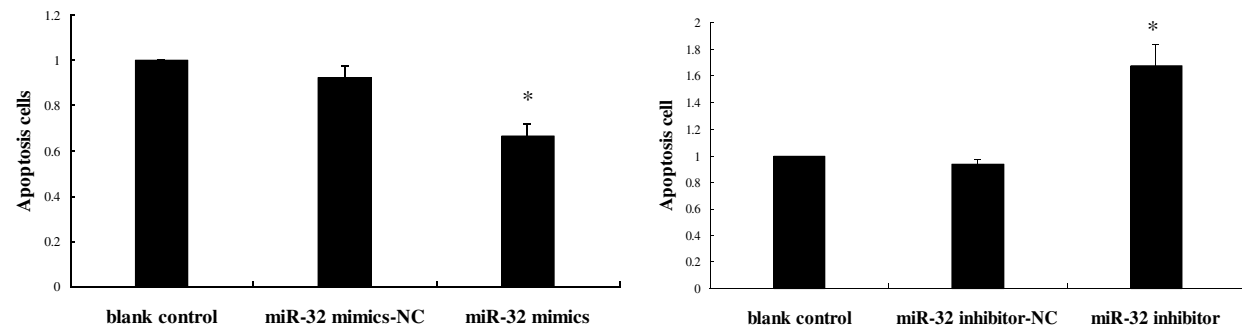

Supplement: MOESM5 [file 9552488]
